# Supplementary material for: Simple basic zirconium carbonate: low temperature catalysis for hydrogen transfer of biomass-derived carboxides
Source: Royal Society of Chemistry journal article supplement (doi:10.1039/c9gc03033f), 2019-01-01
Supplement: c9gc03033f1.pdf [file c9gc03033f1.pdf]

## Supporting Information

# Simple basic zirconium carbonate: Low temperature catalysis for hydrogen transfer of biomass-derived carboxides

Mingwei Ma,<sup>a</sup> Pan Hou,<sup>a</sup> Jingjie Cao,<sup>a</sup> Hui Liu,<sup>a</sup> Xinyu Yan,<sup>a</sup> Xingliang Xu,<sup>b</sup> Huijuan Yue,<sup>a</sup> Ge Tian<sup>a,\*</sup> and Shouhua Feng<sup>a</sup>

<sup>a</sup>State Key Laboratory of Inorganic Synthesis and Preparative Chemistry, College of Chemistry, Jilin University, Changchun 130012, P. R. China.

<sup>b</sup>College of Chemistry and Material Science, Shandong Agricultural University, Taian 271018, P. R. China.

Corresponding author: \* [tiange@jlu.edu.cn](mailto:tiange@jlu.edu.cn).

### 1. The test Conditions of the NH<sub>3</sub>-IR and HCOOH-IR spectra.

**Scheme S1.** Preparation of the BZC catalyst.

**Scheme S2.** Process for preparing FUR by two-phase solvent reaction system (a).  
Organic phase fractionation and purification device (b).

**Figure S1.** XRD patterns (a) and FT-IR spectra (b) of BMC-Mg and BZC-Zn.

**Figure S2.** TG analysis of the BZC catalyst.

**Figure S3.** TEM image of the BZC catalyst.

**Figure S4.** ATR-IR spectra of FUR adsorbed on different Zr-based catalysts in the 1625-1705 cm<sup>-1</sup> region.

**Figure S5.** In situ ATR-IR spectra during the hydrogen transfer of FUR in 2-PrOH over the BZC.

**Figure S6.** GC-MS spectra of different FUR.

**Figure S7.** MS spectra of extract phase (extract FUR).

**Figure S8.** The color change of the BZC catalyst before and after the reaction.

**Table S1.** The hydrogen transfer reaction of the biomass-derived carboxides using various catalysts in recent years.

**Table S2.** Hydrogen transfer reaction of FUR to FFA with isopropanol as solvent over various catalysts

### 1. The test Conditions of the NH<sub>3</sub>-IR and HCOOH-IR spectra.

NH<sub>3</sub>-IR spectra were recorded on a Bruker 80 v with a range of 600-4000 cm<sup>-1</sup> for the MCT detector. The catalyst powder was placed in an in situ IR cell equipped with a ZnSe window. Prior to adsorption, the catalyst in the IR cells was purified in N<sub>2</sub> flow at 150 °C for 0.5 hours. The cells were then cooled to 50 °C. Next, NH<sub>3</sub> gas was introduced into the cells and desorbed in a flow of N<sub>2</sub> at 50 °C to remove excess NH<sub>3</sub> molecules in the stream of N<sub>2</sub>. After 0.5 hours, the IR spectra of the catalyst was collected. Similarly, HCOOH-IR spectra was tested by the same method.

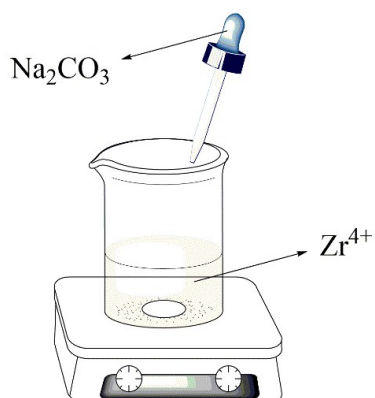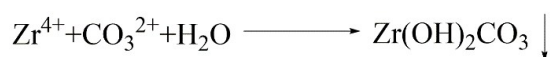

**Scheme S1.** Preparation of the BZC catalyst.

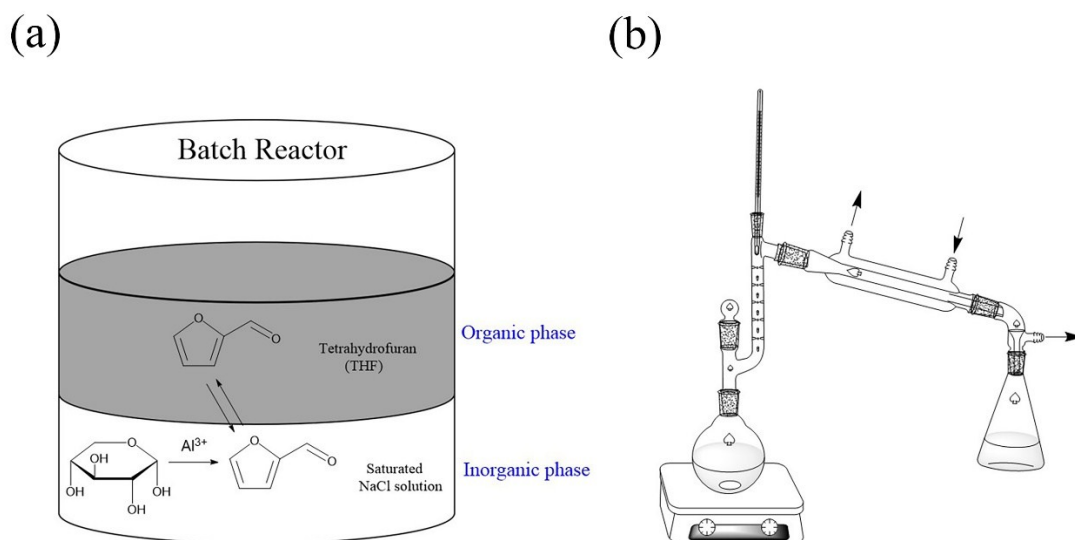

**Scheme S2.** Process for preparing FUR by two-phase solvent reaction system (a). Organic phase fractionation and purification device (b).

The xylose-derived FUR was prepared by a two-phase solvent reaction system. In detail, the reaction was carried on in a stainless steel autoclave (40 mL) heated in a temperature-controlled oil bath. The mixture of xylose, solvents (biphase: 15 mL THF as extract phase and 15 mL saturated NaCl solution as reaction phase) and  $\text{AlCl}_3$  were put in the Teflon-lined stainless steel autoclave (40 mL) equipped with a magnetic stirring bar. After reaction, the reactor was cooled to room temperature. The organic phase (extract phase) was moved to a fractionation unit for purification of FUR. The inorganic phase (reaction phase) was added to xylose and filled with 15 mL THF to continue production of FUR.

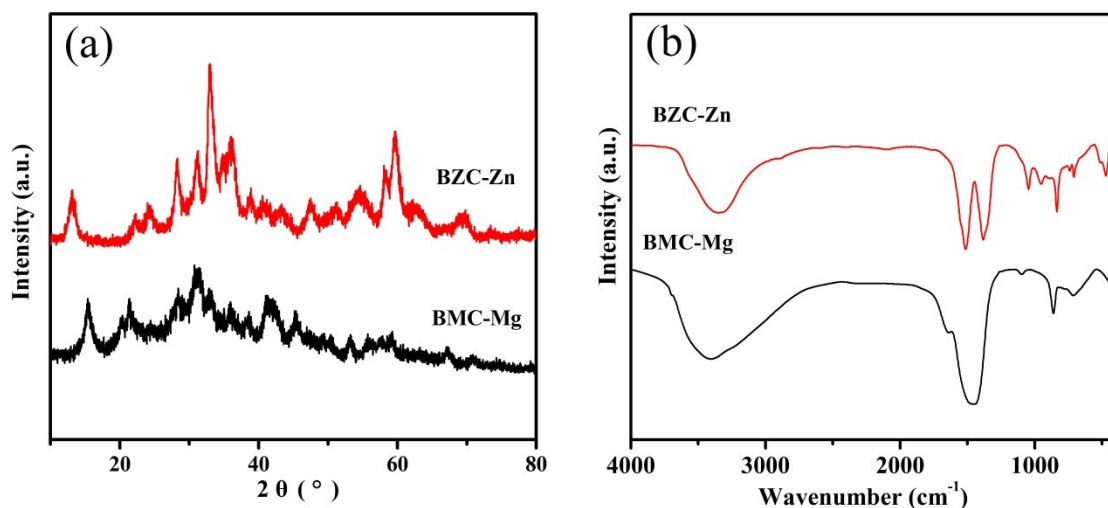

**Figure S1.** XRD patterns (a) and FT-IR spectra (b) of BMC-Mg and BZC-Zn.

The basic magnesium carbonate (BMC-Mg) catalyst was prepared by the precipitation method. Briefly,  $\text{Mg}(\text{NO}_3)_2 \cdot 6\text{H}_2\text{O}$  (10 mmol) was dissolved in 60 mL deionized water and was stirred at ambient temperature for 15 mins. With vigorous stirring, 1 M  $\text{Na}_2\text{CO}_3$  solvent was added dropwise until  $\text{pH}=7$ . After being aged for 5 h at room temperature, the precipitate was separated by filtration and washed several times with deionized water. The resulting precipitate was dried in the oven at  $80\text{ }^\circ\text{C}$  for 5 h. Basic zinc carbonate (BZC-Zn) catalysts was also prepared by the same method.

As for Figure S1a, the XRD map shows the characteristic peaks of BMC-Mg ( $2\theta=15.3^\circ, 21.2^\circ, 30.8^\circ, 33.2^\circ, 41.2^\circ, 52.8^\circ, 59.0^\circ$  and  $66.9^\circ$ . PDF, 29-0857) and BZC-Zn, respectively ( $2\theta=13.6^\circ, 22.2^\circ, 24.2^\circ, 28.4^\circ, 31.3^\circ, 33.2^\circ, 36.2^\circ, 43.3^\circ, 47.3^\circ, 54.3^\circ, 59.7^\circ$  and  $69.8^\circ$ . PDF, 19-1458). In addition, from the Figure S1b, it can be also seen the FT-IR spectrum peaks of BMC-Mg and BZC-Zn in good accordance with the XRD observation. Therefore, it can be stated that the synthesized samples are indeed BMC-Mg and BZC-Zn.

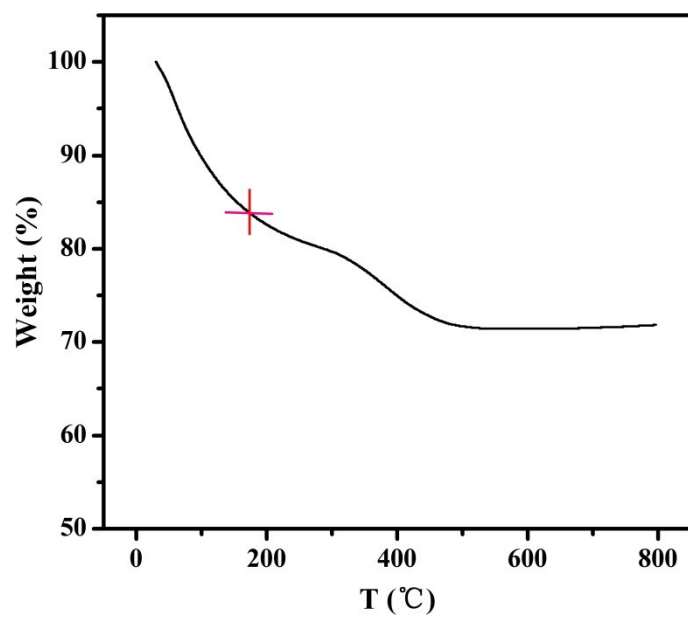

**Figure S2.**TG analysis of the BZC catalyst.

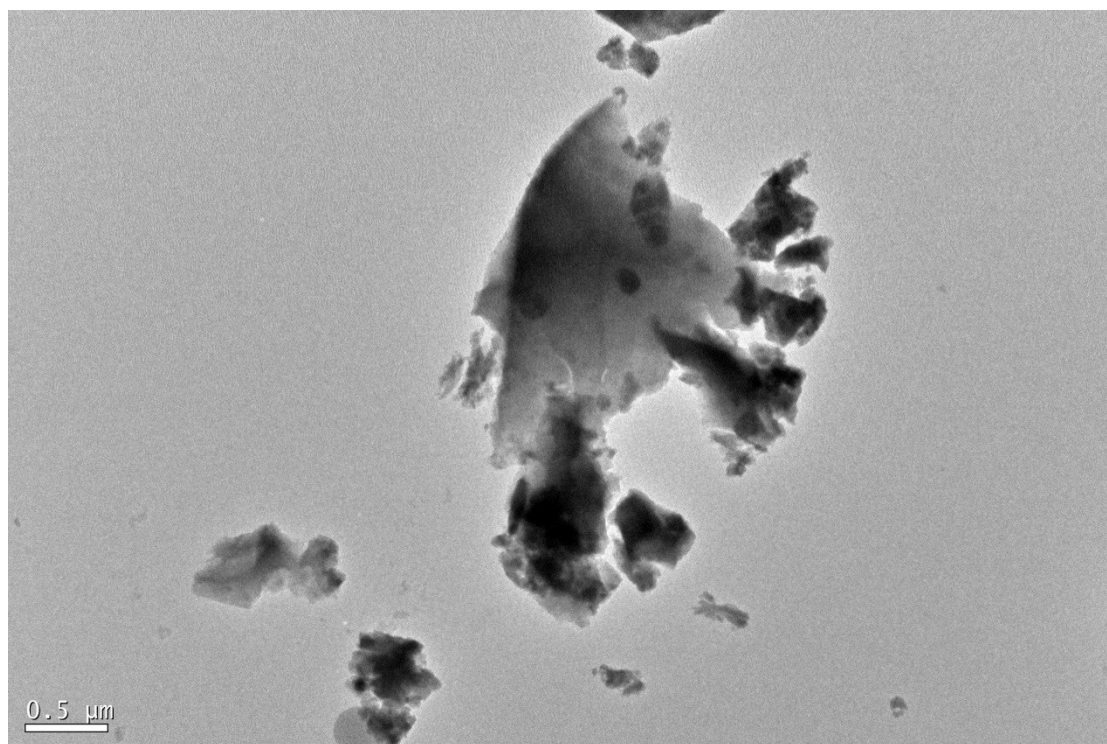

**Figure S3.** TEM image of the BZC catalyst.

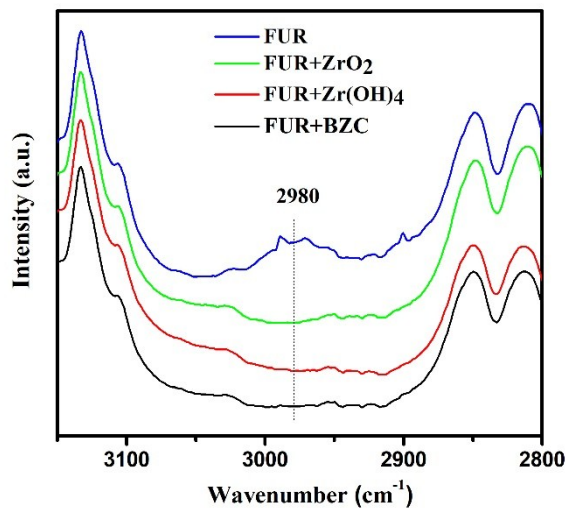

**Figure S4.** ATR-IR spectra of FUR adsorbed on different Zr-based catalysts in the 2800-3150  $\text{cm}^{-1}$  region.

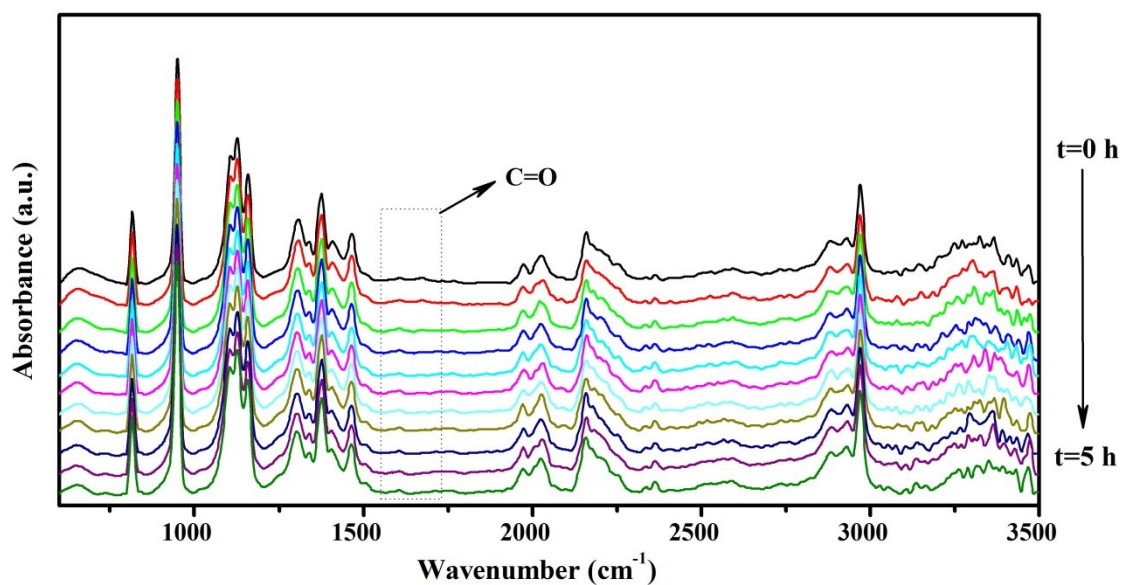

**Figure S5.** In situ ATR-IR spectra during the hydrogen transfer of FUR in 2-PrOH over the BZC. Reaction condition: FUR (5.03 mmol), 2-PrOH (150 mL) catalyst (0.75 g), 80 °C.

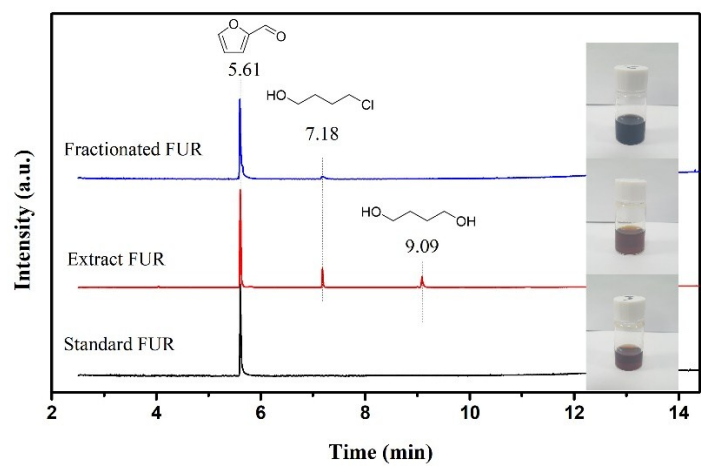

Figure S6. GC-MS spectra of different FUR.

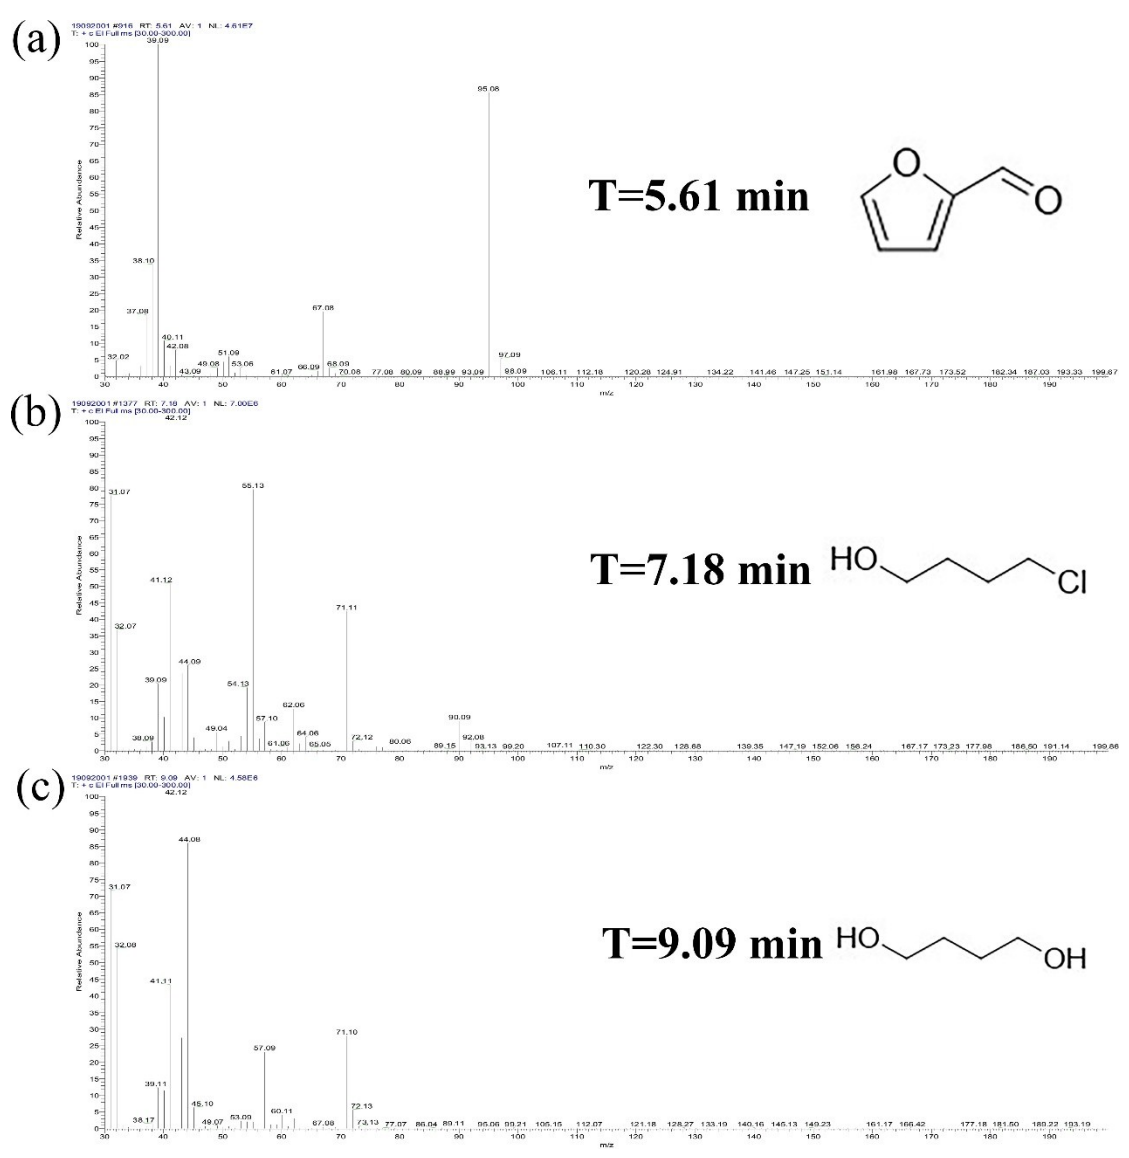

Figure S7. MS spectra of extract phase (extract FUR).

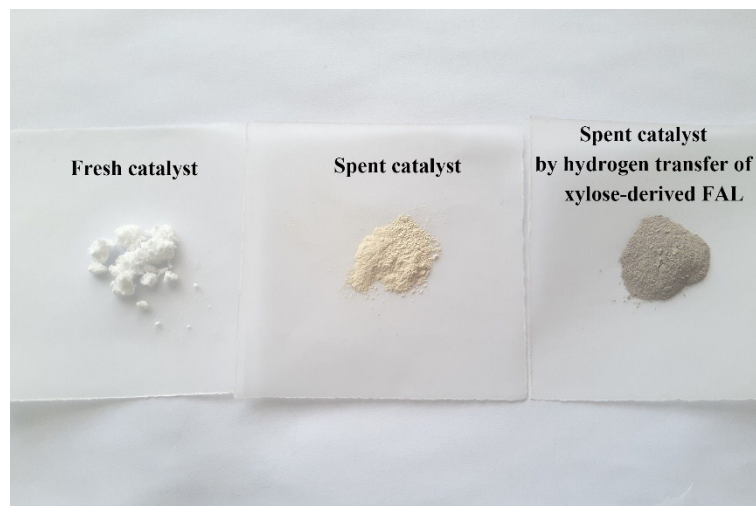

**Figure S8.** The color change of the BZC catalyst before and after the reaction.



**Table S1.** The hydrogen transfer reaction of the biomass-derived carboxides using various catalysts in recent years.

| Entry | Catalysts                                     | Reactant /product | H-donor | Reaction conditions  | C./%  | Y./%  | S./%  | Refs      |
|-------|-----------------------------------------------|-------------------|---------|----------------------|-------|-------|-------|-----------|
| 1     | BZC                                           | FUR/FFA           | 2-PrOH  | room temperature, 5d | 93.77 | 92.99 | 99.16 | This work |
|       |                                               | FUR/FFA           | 2-PrOH  | 80°C, 5h             | 97.69 | 96.67 | 98.95 |           |
|       |                                               | FUR/FFA           | 2-PrOH  | 180°C, 15min         | 91.02 | 90.29 | 99.19 |           |
|       |                                               | HMF/BHMF          | 2-PrOH  | 80°C, 9h             | >99   | >99   | >99   |           |
|       |                                               | ML/GVL            | 2-PrOH  | 140°C, 15h           | 97.61 | 91.32 | 93.56 |           |
| 2     | ZrO <sub>2</sub>                              | EL/GVL            | ethanol | 250°C, 3h            | 95.5  | 81.5  | 85.3  | 1         |
| 3     | Zr(OH) <sub>4</sub>                           | EL/GVL            | 2-PrOH  | 200°C, 1h            | 93.6  | 88.45 | 94.5  | 2         |
| 4     | Al-Zr oxides                                  | EL/GVL            | 2-PrOH  | 220°C, 4h            | 95.5  | 83.2  | 87.1  | 3         |
| 5     | Al <sub>2</sub> O <sub>3</sub>                | FUR/FFA           | 2-PrOH  | 150°C, 6h            | >90   | >90   | >90   | 4         |
| 6     | Ru/C                                          | FUR/FFA           | benzyl  | 150°C, 4h            | 100   | 100   | 100   | 5         |
|       |                                               | HMF/BHMF          | alcohol | 150°C, 10h           | 90.7  | 86.89 | 95.8  |           |
| 7     | $\gamma$ -Fe <sub>2</sub> O <sub>3</sub> @HAP | FUR/FFA           | 2-PrOH  | 180°C, 10h           | 96.2  | 91.6  | 95.3  | 6         |
|       |                                               | HMF/BHMF          | 2-PrOH  | 180°C, 10h           | 78.2  | 72.0  | 92.1  |           |
|       |                                               | EL/GVL            | 2-PrOH  | 180°C, 12h           | 41.2  | 36.0  | 87.3  |           |
| 8     | NiFe <sub>2</sub> O <sub>4</sub>              | FUR/FFA           | 2-PrOH  | 180°C, 6h            | 99    | 94    | 95    | 7         |
| 9     | Al-Zr@Fe                                      | FUR/FFA           | 2-PrOH  | 180°C, 4h            | 99.1  | 90.5  | 91.3  | 8         |
|       |                                               | HMF/BHMF          | 2-PrOH  | 180°C, 4h            | 82.7  | 71.0  | 85.9  |           |
| 10    | Zr-SBA-15                                     | FUR/FFA           | 2-PrOH  | 90°C, 4h             | 65.0  | 45.0  | 69.2  | 9         |
| 11    | ZrPN                                          | FUR/FFA           | 2-PrOH  | 100°C, 15h           | 93.0  | 90.0  | 96.8  | 10        |
|       |                                               | HMF/BHMF          | 2-PrOH  | 140°C, 2h            | >99   | 98    | 98    |           |
|       |                                               | EL/GVL            | 2-PrOH  | 160°C, 10h           | 93    | 92    | 99    |           |
| 12    | Zr-PhyA                                       | FUR/FFA           | 2-PrOH  | 100°C, 2h            | 99.3  | 99.3  | 99.3  | 11        |
|       |                                               | ML/GVL            | 2-PrOH  | 130°C, 8h            | 100   | 95.8  | 95.8  |           |
| 13    | Zr-HAs                                        | FUR/FFA           | 2-PrOH  | 50°C, 15h            | 97.4  | 96.9  | >99   | 12        |
|       |                                               | ML/GVL            | 2-PrOH  | 150°C, 15            | >99   | 85    | 85    |           |
| 14    | m-PhPZr                                       | FUR/FFA           | 2-PrOH  | 120°C, 2h            | >99   | 99    | 99    | 13        |
|       |                                               | HMF/BHMF          | 2-PrOH  | 120°C, 2h            | >99   | 93    | 93    |           |
|       |                                               | EL/GVL            | 2-PrOH  | 160°C, 6h            | 100   | 98    | 98    |           |

## References

- [1] X. Tang, L. Hu, Y. Sun, G. Zhao, W. Hao, L. Lin, *RSC Adv.* **2013**, *3*, 10277–10284.

- [2] X. Tang, H. Chen, L. Hu, W. Hao, Y. Sun, X. Zeng, L. Lin, S. Liu, *Appl. Catal. B: Environ.* **2014**, *147*, 827–834.
- [3] J. He, H. Li, Y. Lu, Y. Liu, Z. Wu, D. Hu, S. Yang, *Appl. Catal. A* **2016**, *510*, 11–19.
- [4] R. López-Asensio, J. A. Cecilia, C. P. Jiménez-Gómez, C. García-Sancho, R. Moreno-Tost, P. Maireles-Torres, *Appl. Catal. A* **2018**, *556* 1–9.
- [5] Z. Gao, LanYang, G. Fan, F. Li, *ChemCatChem* **2016**, *8*, 3769–3779.
- [6] F. Wang, Z. Zhang, *ACS Sustainable Chem. Eng.* **2017**, *5*, 942-947.
- [7] J. He, S. Yang, A. Riisager, *Catal. Sci. Technol.* **2018**, *8*, 790–797.
- [8] J. He, H. Li, A. Riisager, S. Yang, *ChemCatChem* **2018**, *10*, 430–438.
- [9] J. Iglesias, J. A. Melero, G. Morales, J. Moreno, Y. Segura, M. Paniagua, A. Cambra, B. Hernández, *Catalysts* **2015**, *5*, 1911-1927.
- [10] H. Li, J. He, A. Riisager, S. Saravanamurugan, B. Song, S. Yang, *ACS Catal.* **2016**, *6*, 7722-7727.
- [11] J. Song, B. Zhou, H. Zhou, L. Wu, Q. Meng, Z. Liu, B. Han, *Angew.Chem. Int.Ed.* **2015**, *54*, 9399-9403.
- [12] Y. Sha, Z. Xiao, H. Zhou, K. Yang, Y. Song, N. Li, R. He, K. Zhi, Q. Liu, *Green Chem.* **2017**, *19*, 4829–4837.
- [13] H. Li, Z. Fang, J. He, S. Yang, *ChemSusChem* **2017**, *10*, 681 –686.

**Table S2.** Hydrogen transfer reaction of FUR to FFA with isopropanol as solvent over various catalysts

| Entry | Catalyst            | Conversion (%) | Yield (%) | Selectivity (%) |
|-------|---------------------|----------------|-----------|-----------------|
| 1     | MgO                 | <1             | 0         | 0               |
| 2     | Mg(OH) <sub>2</sub> | <1             | 0         | 0               |
| 3     | NiO                 | <1             | 0         | 0               |
| 4     | Ni(OH) <sub>2</sub> | <1             | 0         | 0               |
| 5     | CuO                 | <1             | 0         | 0               |
| 6     | Cu(OH) <sub>2</sub> | <1             | 0         | 0               |
| 7     | ZnO                 | <1             | 0         | 0               |
| 8     | Zn(OH) <sub>2</sub> | <1             | 0         | 0               |

Conditions: catalyst (0.1 g), FUR (0.67 mmol), 2-PrOH (20 mL), 80 °C, 5 h.
